# Supplementary material for: Metal nickel nanoparticles in situ generated in rice husk char for catalytic reformation of tar and syngas from biomass pyrolytic gasification
Source: Royal Society of Chemistry journal article supplement (doi:10.1039/c4ra07760a), 2014-01-01
Supplement: c4ra07760a1.pdf [file c4ra07760a1.pdf]

### Supplementary Materials

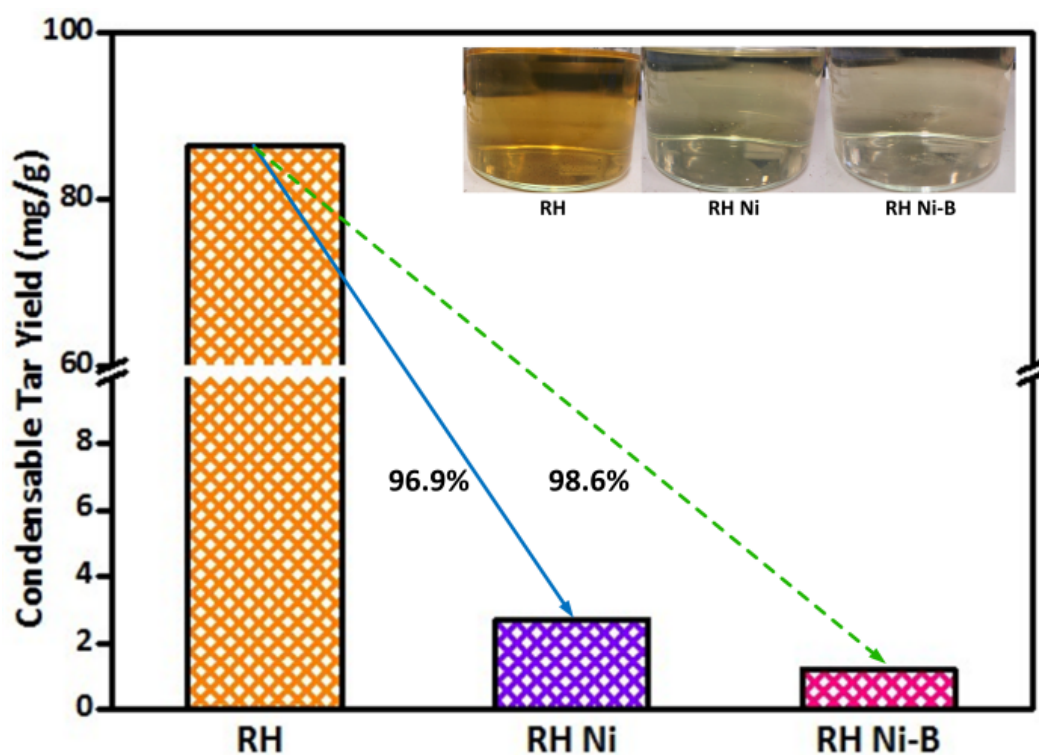

Figure S-1. The condensable tar yields of RHs pyrolysis at 700 °C

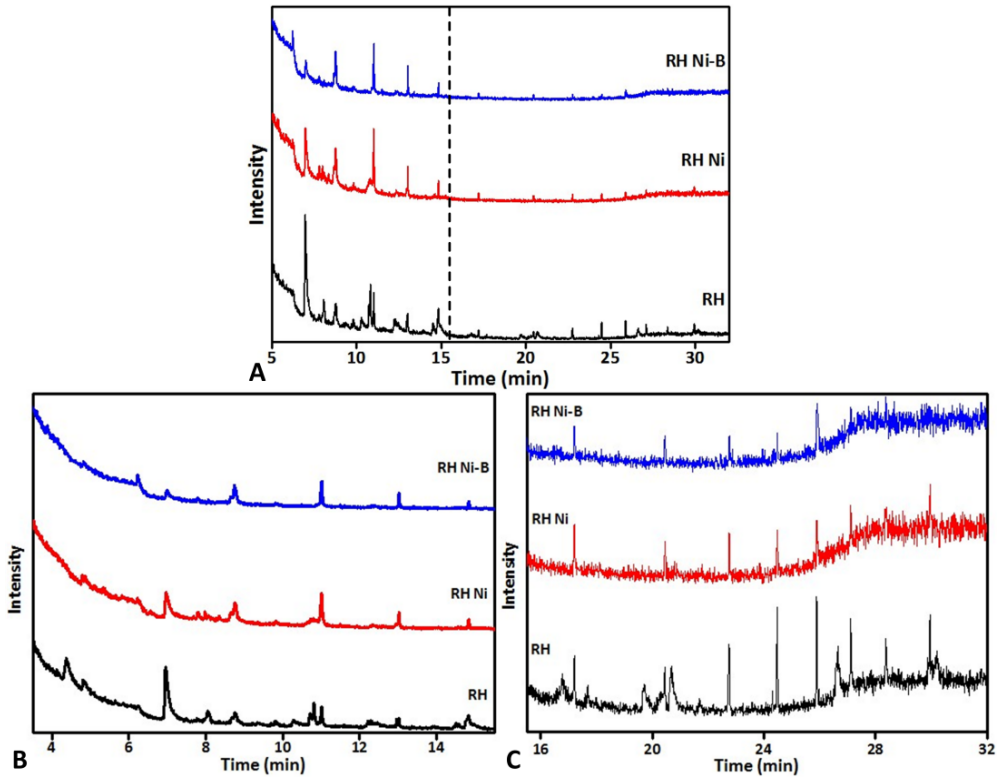

**Figure S-2. GC-MS spectra of the collected tar samples**

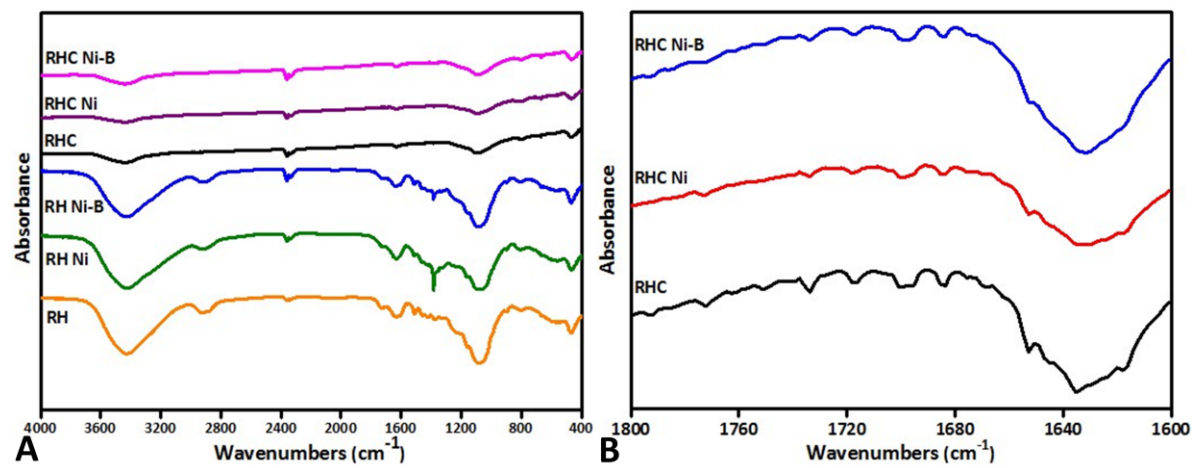

Figure S-3 FTIR spectra of RHs before and after pyrolysis

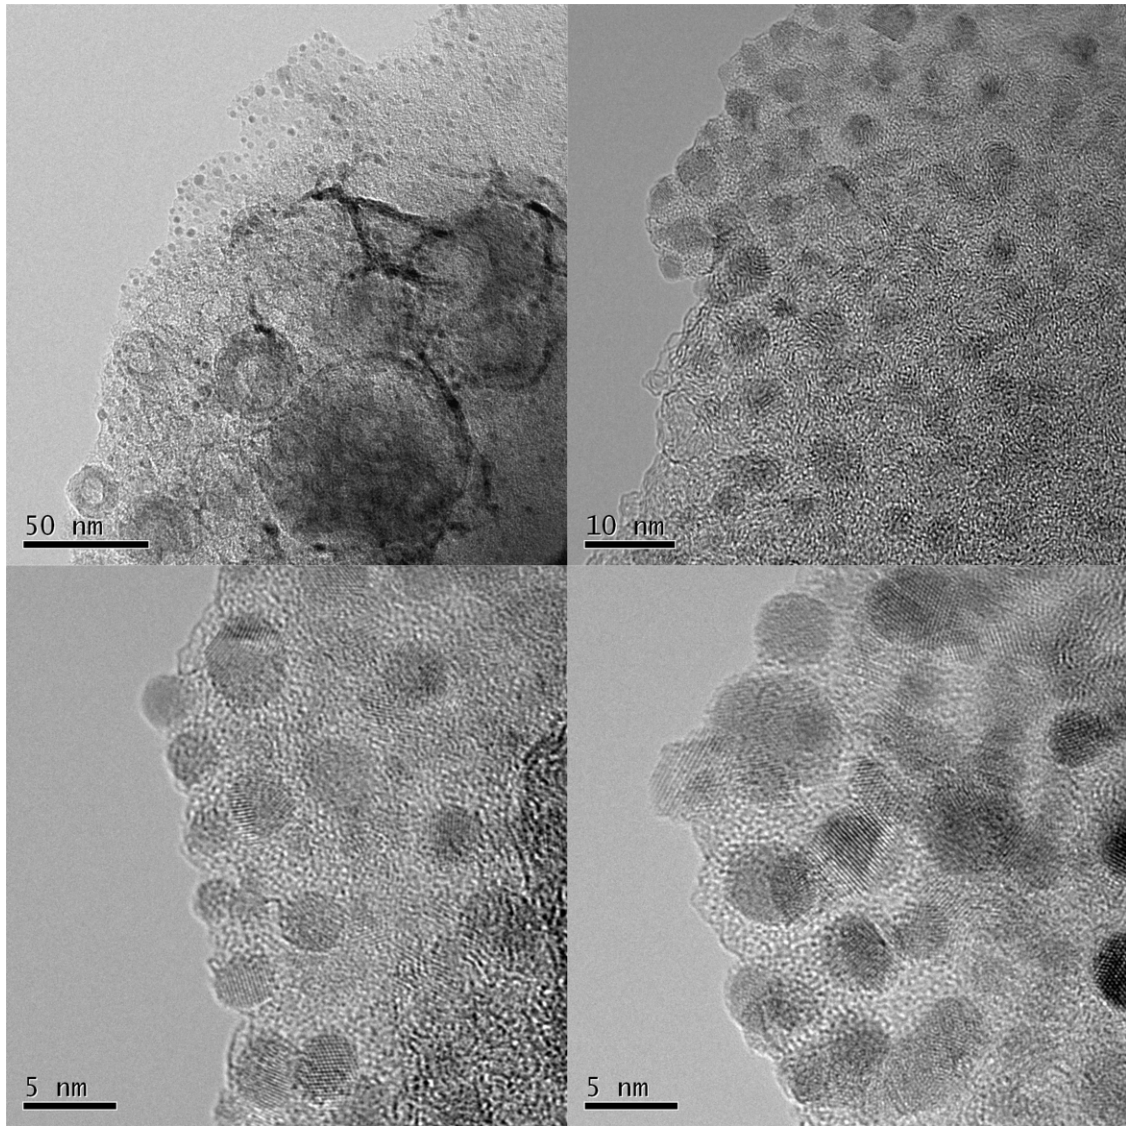

**Figure S-4. FE-TEM images of the RHC Ni**
